# Supplementary material
Source: MDPI journal article supplement (https://www.mdpi.com/1424-2818/13/5/194)
Supplement: s1 [file s1]

## Supplementary material

Figure S1. Correlation of forearm sizes and latitude of *P. fulvus* and *P. gymnonotus*.

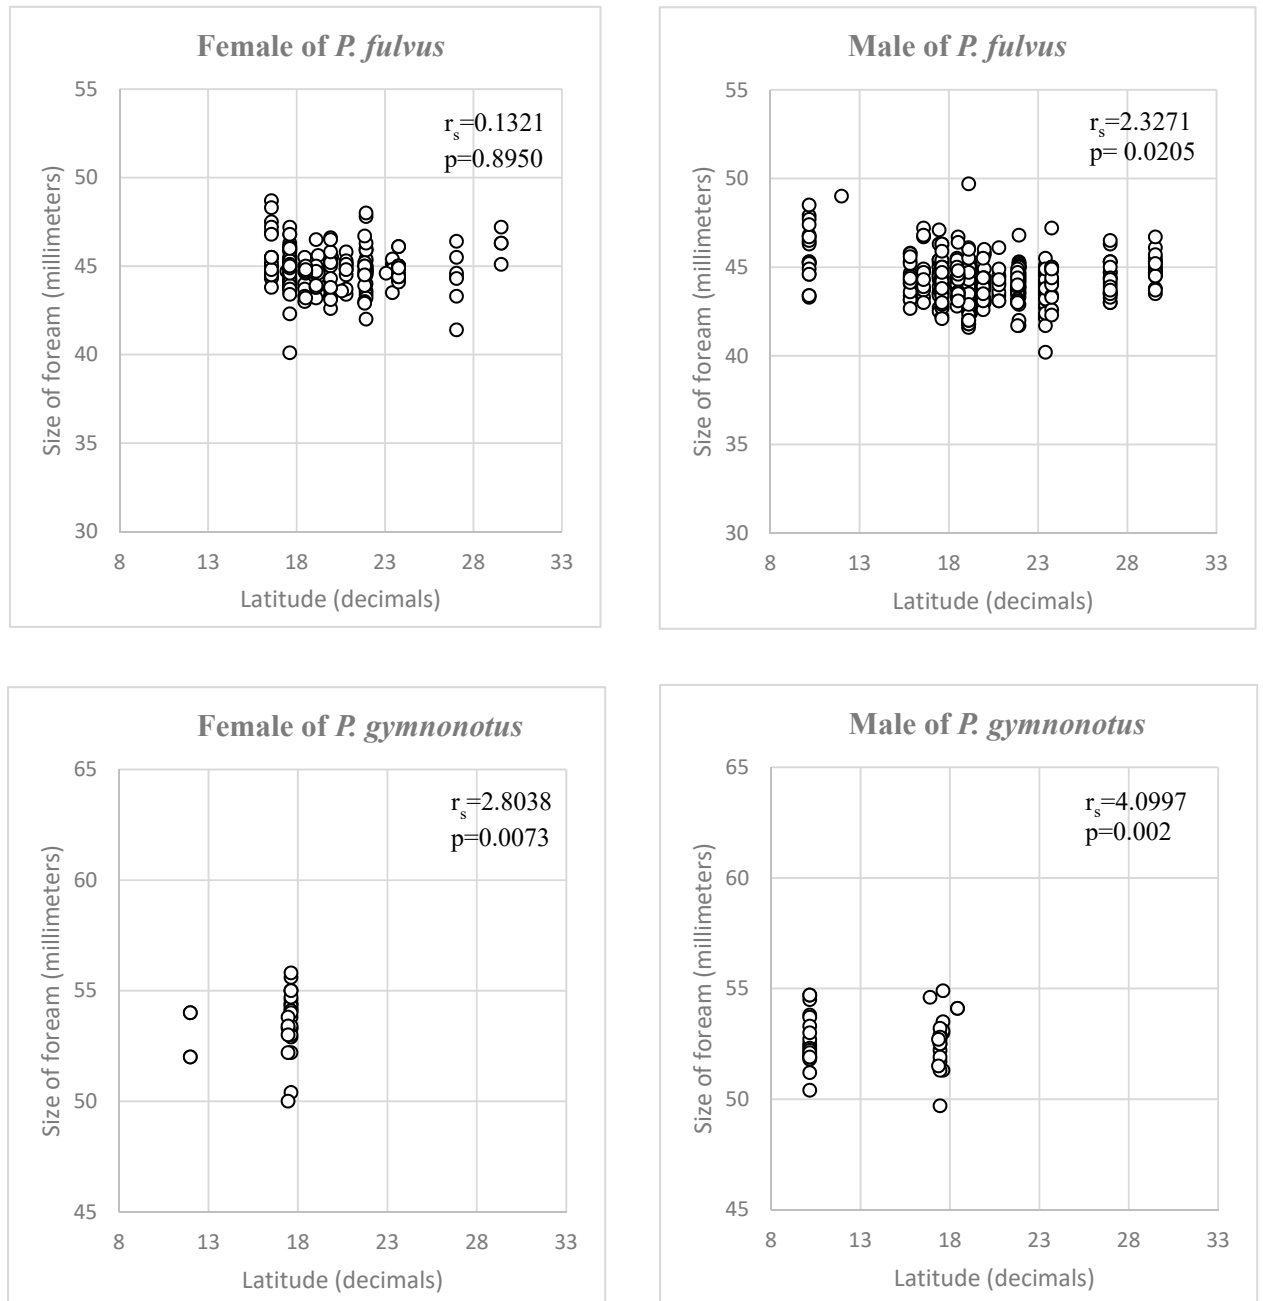

Figure S2. Bayesian reconstruction with divergence time for DNanc+DNamt in BEAST. Bars show the 95% interval for the high posterior density (HPD). Divergence time value above each branch, time in millions of years ago. Down with Posterior probability.

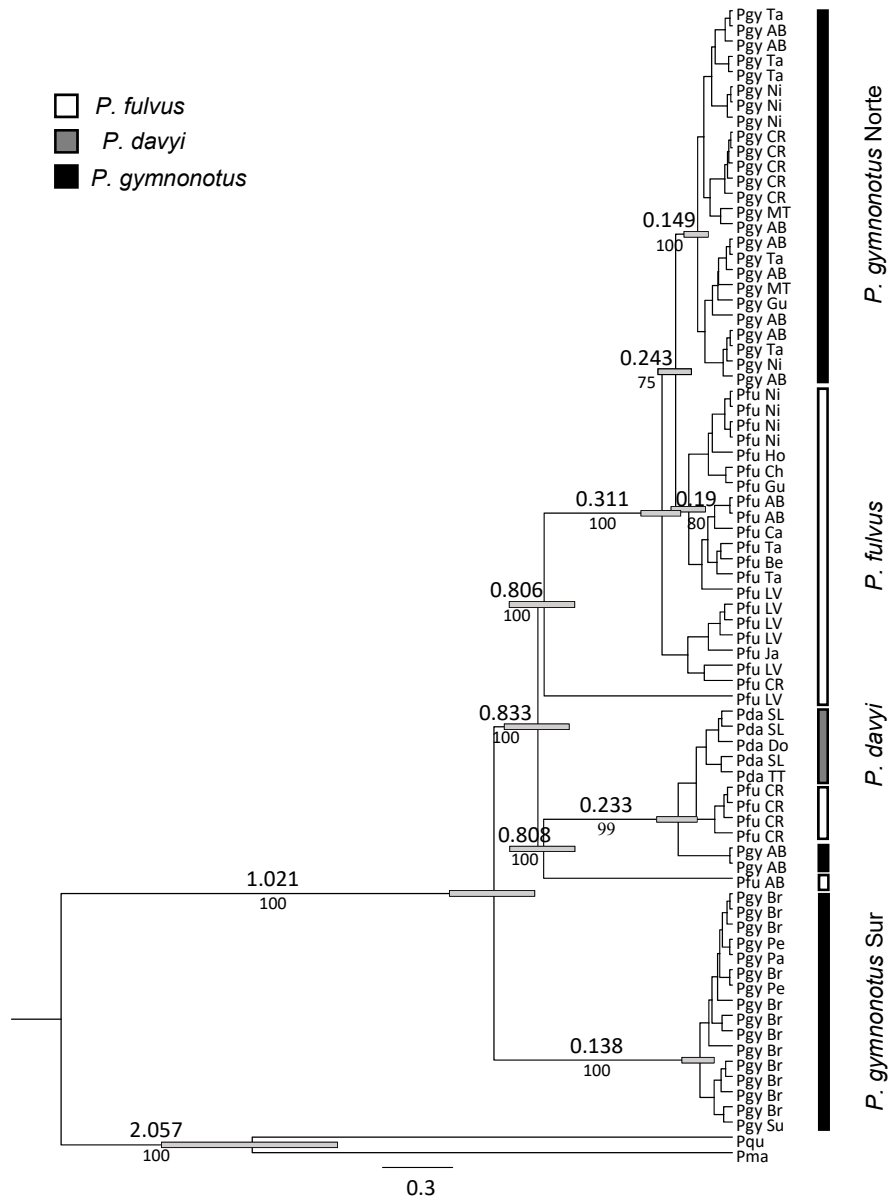

Figure S3. Distribution haplotype for **a.** *P. fulvus* and **b.** *P. gymnonotus*.

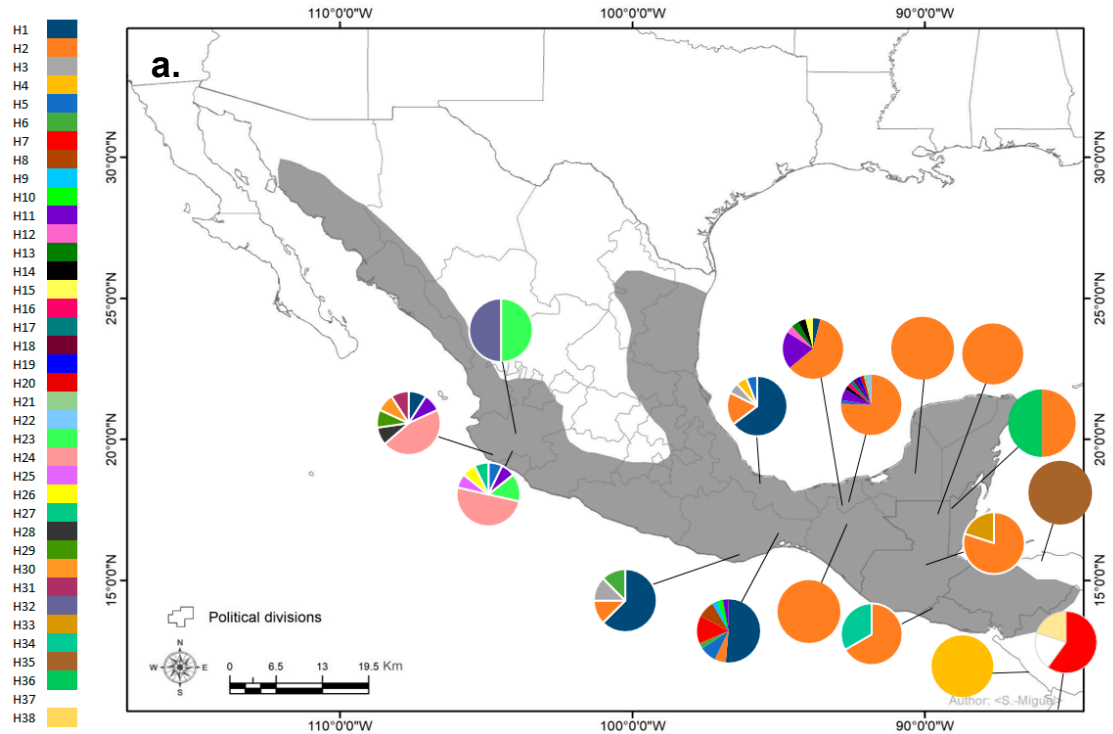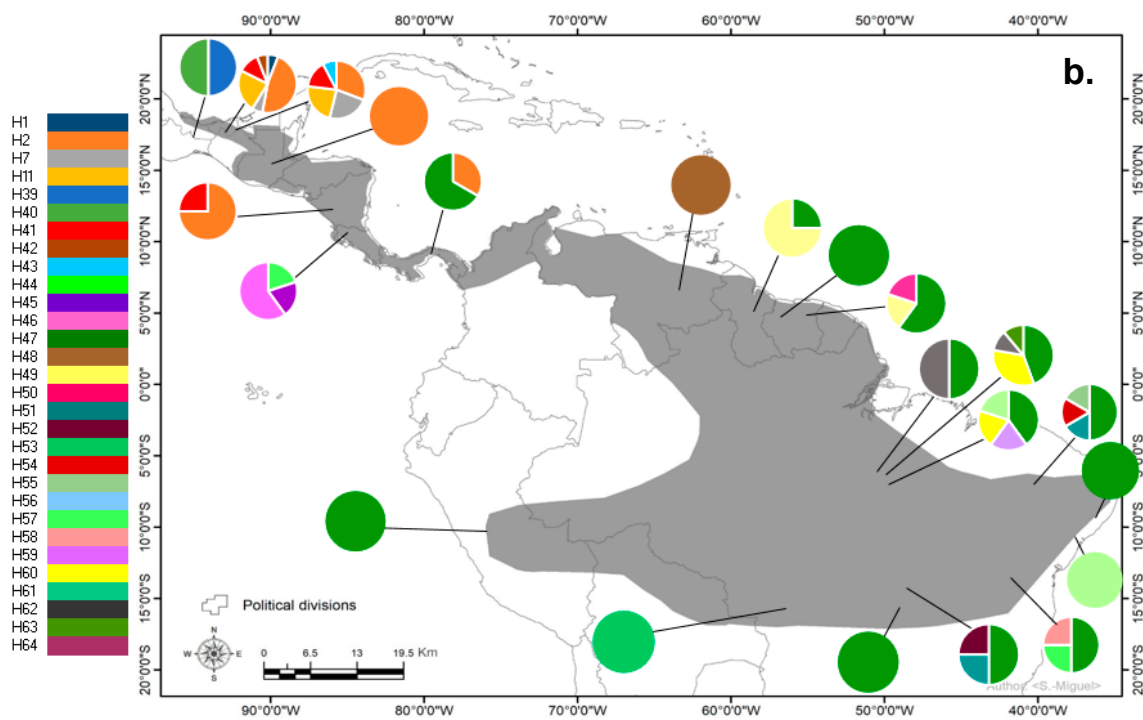

Table S1. Study localities type of amplified marker (B=COI; C=PRKC1; D= STAT5A; F=RAG2; M=Microsatellites) and GenBank access number.

| Study site                                             | Species          | Marker | ID      | GenBank  | Citation    |
|--------------------------------------------------------|------------------|--------|---------|----------|-------------|
| Laguna Encantada,<br>Veracruz, Mexico<br><br><b>LE</b> | <i>P. fulvus</i> | B      | PfLE01  | MT860955 | This studio |
|                                                        |                  | B      | PfLE02  | MT860956 |             |
|                                                        |                  | B      | PfLE03  | MT860957 |             |
|                                                        |                  | B      | PfLE04  | MT860958 |             |
|                                                        |                  | B      | PfLE05  | MT860959 |             |
|                                                        |                  | B      | PfLE06  | MT860960 |             |
|                                                        |                  | B      | PfLE07  | MT860961 |             |
|                                                        |                  | B      | PfLE08  | MT860962 |             |
|                                                        |                  | B      | PfLE09  | MT860963 |             |
|                                                        |                  | B      | PfLE10  | MT860964 |             |
|                                                        |                  | B      | PfLE11  | MT860965 |             |
|                                                        |                  | B      | PfLE12  | MT860966 |             |
|                                                        |                  | B      | PfLE13  | MT860967 |             |
|                                                        |                  | B      | PfLE14  | MT860968 |             |
|                                                        |                  | B      | PfLE15  | MT860969 |             |
|                                                        |                  | B      | PfLE16  | MT860970 |             |
|                                                        |                  | B      | PfLE17  | MT860971 |             |
| Cerro Huatulco,<br>Oaxaca, Mexico<br><br><b>CH</b>     | <i>P. fulvus</i> | BM     | PfCH01  | MT860972 | This studio |
|                                                        |                  | BM     | PfCH02  | MT860973 |             |
|                                                        |                  | BM     | PfCH03  | MT860974 |             |
|                                                        |                  | BM     | PfCH04  | MT860975 |             |
|                                                        |                  | BM     | PfCH05  | MT860976 |             |
|                                                        |                  | BM     | PfCH06  | MT860977 |             |
|                                                        |                  | BM     | PfCH07  | MT860978 |             |
|                                                        |                  | BM     | PfCH08  | MT860979 |             |
|                                                        |                  | BM     | PfCH09p | MT860980 |             |
|                                                        |                  | BM     | PfCH10  | MT860981 |             |
|                                                        |                  | BM     | PfCH11  | MT860982 |             |

|                                       |                  |       |        |                                        |             |
|---------------------------------------|------------------|-------|--------|----------------------------------------|-------------|
|                                       |                  | BM    | PfCH12 | MT860983                               |             |
|                                       |                  | BM    | PfCH13 | MT860984                               |             |
|                                       |                  | BM    | PfCH14 | MT860985                               |             |
|                                       |                  | BM    | PfCH15 | MT860986                               |             |
|                                       |                  | BM    | PfCH16 | MT860987                               |             |
| La Venta, Oaxaca,<br>Mexico<br><br>LV | <i>P. fulvus</i> | BM    | PfLV01 | MT860920                               | This studio |
|                                       |                  | BM    | PfLV02 | MT860921                               |             |
|                                       |                  | BM    | PfLV03 | MT860922                               |             |
|                                       |                  | BM    | PfLV04 | MT860923                               |             |
|                                       |                  | BM    | PfLV05 | MT860924                               |             |
|                                       |                  | BM    | PfLV06 | MT860925                               |             |
|                                       |                  | BM    | PfLV07 | MT860926                               |             |
|                                       |                  | BM    | PfLV08 | MT860927                               |             |
|                                       |                  | BM    | PfLV09 | MT860928                               |             |
|                                       |                  | BM    | PfLV10 | MT860929                               |             |
|                                       |                  | BM    | PfLV11 | MT860930                               |             |
|                                       |                  | BM    | PfLV12 | MT860931                               |             |
|                                       |                  | BM    | PfLV13 | MT860932                               |             |
|                                       |                  | BM    | PfLV14 | MT860933                               |             |
|                                       |                  | BCDFM | PfLV15 | MT860934, MT555040, MT549059, MT536984 |             |
|                                       |                  | BM    | PfLV16 | MT860935                               |             |
|                                       |                  | BM    | PfLV17 | MT860936                               |             |
|                                       |                  | BM    | PfLV18 | MT860937                               |             |
|                                       |                  | BM    | PfLV19 | MT860938                               |             |
|                                       |                  | BM    | PfLV20 | MT860939                               |             |
|                                       |                  | BM    | PfLV21 | MT860940                               |             |
|                                       |                  | BM    | PfLV22 | MT860941                               |             |
|                                       |                  | BM    | PfLV23 | MT860942                               |             |
|                                       |                  | BM    | PfLV24 | MT860943                               |             |
|                                       |                  | BCDFM | PfLV25 | MT860944, MT555041, MT549060, MT536985 |             |
|                                       |                  | B     | PfLV26 | MT860945                               |             |
|                                       |                  | BM    | PfLV27 | MT860946                               |             |

|                                                          |                      |                                                                                                                   |                                                                                                                                                                                                      |                                                                                                                                                                                                                                         |             |
|----------------------------------------------------------|----------------------|-------------------------------------------------------------------------------------------------------------------|------------------------------------------------------------------------------------------------------------------------------------------------------------------------------------------------------|-----------------------------------------------------------------------------------------------------------------------------------------------------------------------------------------------------------------------------------------|-------------|
|                                                          |                      | BM<br>BCDFM<br>BCDFM<br>BCDFM<br>BM<br>BM<br>BM<br>BCDFM                                                          | PfLV28<br>PfLV29<br>PfLV30<br>PfLV31<br>PfLV32<br>PfLV33<br>PfLV34<br>PfLV35                                                                                                                         | MT860947<br>MT860948, MT555042, MT549061, MT536986<br>MT860949, MT555043, MT549062, MT536987<br>MT860950, MT555044, MT549063, MT536988<br>MT860951<br>MT860952<br>MT860953<br>MT860954, MT555045, MT549064, MT536989                    |             |
| Martínez de la Torre,<br>Oaxaca, Mexico<br><br><b>MT</b> | <i>P. gymnonotus</i> | BCDF<br>BCDF                                                                                                      | PgMT01<br>PgMT02                                                                                                                                                                                     | MT863662, MT559922, MT555024, MT547969<br>MT863663, MT559923, MT555025, MT547970                                                                                                                                                        | [55]        |
| Tapijulapa, Tabasco,<br>Mexico<br><br><b>Ta</b>          | <i>P. fulvus</i>     | M<br>M<br>BM<br>BM<br>BM<br>BM<br>M<br>BM<br>BM<br>BM<br>BM<br>B<br>BCDFM<br>M<br>BM<br>BM<br>BM<br>BM<br>M<br>BM | PfTa01<br>PfTa02<br>PfTa03<br>PfTa04<br>PfTa05<br>PfTa06<br>PfTa07<br>PfTa08<br>PfTa09<br>PfTa10<br>PfTa11<br>PfTa12<br>PfTa13<br>PfTa14<br>PfTa15<br>PfTa16<br>PfTa17<br>PfTa18<br>PfTa19<br>PfTa20 | -<br>-<br>MT860895<br>MT860896<br>MT860897<br>MT860898<br>-<br>MT860899<br>MT860900<br>MT860901<br>MT860902<br>MT860903<br>MT860904, MT555038, MT549057, MT536982<br>-<br>MT860905<br>MT860906<br>MT860907<br>MT860908<br>-<br>MT860909 | This studio |

|                                                 |                      |                                                                                                                   |                                                                                                                                                                        |                                                                                                                                                                                                                                                                                                                                                                |             |
|-------------------------------------------------|----------------------|-------------------------------------------------------------------------------------------------------------------|------------------------------------------------------------------------------------------------------------------------------------------------------------------------|----------------------------------------------------------------------------------------------------------------------------------------------------------------------------------------------------------------------------------------------------------------------------------------------------------------------------------------------------------------|-------------|
|                                                 |                      | BM<br>BM<br>M<br>BM<br>BM<br>M<br>BM<br>BM<br>BM<br>BM<br>BM<br>BCDFM                                             | PfTa21<br>PfTa22<br>PfTa23<br>PfTa24<br>PfTa25<br>PfTa26<br>PfTa27<br>PfTa28<br>PfTa29<br>PfTa30<br>PfTa31<br>PfTa32                                                   | MT860910<br>MT860911<br>-<br>MT860912<br>MT860913<br>-<br>MT860914<br>MT860915<br>MT860916<br>MT860917<br>MT860918<br>MT860919, MT555039, MT549058, MT536983                                                                                                                                                                                                   |             |
| Tapijulapa, Tabasco,<br>Mexico<br><br><b>Ta</b> | <i>P. gymnonotus</i> | BM<br>BCDFM<br>BM<br>BM<br>BM<br>BM<br>BCDFM<br>BCDFM<br>BCDFM<br>BCDFM<br>BM<br>BM<br>BM<br>BM<br>BM<br>BM<br>BM | PgTa01<br>PgTa02<br>PgTa03<br>PgTa04<br>PgTa05<br>PgTa06<br>PgTa07<br>PgTa08<br>PgTa09<br>PgTa10<br>PgTa11<br>PgTa12<br>PgTa13<br>PgTa14<br>PgTa15<br>PgTa16<br>PgTa17 | MT863645<br>MT863646, MT559917, MT555019, MT547964<br>MT863647<br>MT863648<br>MT863649<br>MT863650<br>MT863651, MT559918, MT555020, MT547965<br>MT863652, MT559919, MT555021, MT547966<br>MT863653, MT559920, MT555022, MT547967<br>MT863654, MT559921, MT555023, MT547968<br>MT863655<br>MT863656<br>MT863657<br>MT863658<br>MT863659<br>MT863660<br>MT863661 | This studio |
| Agua Blanca,<br>Tabasco, Mexico                 | <i>P. fulvus</i>     | BM<br>BM<br>BM                                                                                                    | PfAB01<br>PfAB02<br>PfAB03                                                                                                                                             | MT559958<br>MT559959<br>MT559960                                                                                                                                                                                                                                                                                                                               | This studio |

|    |  |       |        |                                        |  |
|----|--|-------|--------|----------------------------------------|--|
| AB |  | B     | PfAB04 | MT559961                               |  |
|    |  | B     | PfAB05 | MT559962                               |  |
|    |  | BM    | PfAB06 | MT559963                               |  |
|    |  | BM    | PfAB07 | MT559964                               |  |
|    |  | BM    | PfAB08 | MT559965                               |  |
|    |  | BM    | PfAB09 | MT559966                               |  |
|    |  | BM    | PfAB10 | MT559967                               |  |
|    |  | BM    | PfAB11 | MT559968                               |  |
|    |  | BM    | PfAB12 | MT559969                               |  |
|    |  | BM    | PfAB13 | MT559970                               |  |
|    |  | BM    | PfAB14 | MT559971                               |  |
|    |  | BM    | PfAB15 | MT559972                               |  |
|    |  | BM    | PfAB16 | MT559973                               |  |
|    |  | BM    | PfAB17 | MT559974                               |  |
|    |  | BM    | PfAB18 | MT860863                               |  |
|    |  | BM    | PfAB19 | MT860864                               |  |
|    |  | BM    | PfAB20 | MT860865                               |  |
|    |  | BM    | PfAB21 | MT860866                               |  |
|    |  | BM    | PfAB22 | MT860867                               |  |
|    |  | BM    | PfAB23 | MT860868                               |  |
|    |  | BM    | PfAB24 | MT860869                               |  |
|    |  | BM    | PfAB25 | MT860870                               |  |
|    |  | BM    | PfAB26 | MT860871                               |  |
|    |  | BM    | PfAB27 | MT860872                               |  |
|    |  | BM    | PfAB28 | MT860873                               |  |
|    |  | BM    | PfAB29 | MT860874                               |  |
|    |  | BM    | PfAB30 | MT860875                               |  |
|    |  | BM    | PfAB31 | MT860876                               |  |
|    |  | BM    | PfAB32 | MT860877                               |  |
|    |  | BCDFM | PfAB33 | MT860878, MT555035, MT549054, MT536979 |  |
|    |  | M     | PfAB34 | -                                      |  |
|    |  | BCDFM | PfAB35 | MT860879, MT555036, MT549055, MT536980 |  |



|                                                  |                      |                                                                                                    |                                                                                                                                                                                  |                                                                                                                                                                                                                                                                                                              |             |
|--------------------------------------------------|----------------------|----------------------------------------------------------------------------------------------------|----------------------------------------------------------------------------------------------------------------------------------------------------------------------------------|--------------------------------------------------------------------------------------------------------------------------------------------------------------------------------------------------------------------------------------------------------------------------------------------------------------|-------------|
|                                                  |                      | BCDFM<br>BM<br>BM<br>BM<br>BM<br>BM<br>BM<br>BM<br>BM<br>BM<br>BM<br>M<br>BM<br>BM<br>BM<br>M<br>M | PfAB36<br>PfAB37<br>PfAB38<br>PfAB39<br>PfAB40<br>PfAB41<br>PfAB42<br>PfAB43<br>PfAB44<br>PfAB45<br>PfAB46<br>PfAB47<br>PfAB48<br>PfAB49<br>PfAB50<br>PfAB51<br>PfAB52<br>PfAB53 | MT860880, MT555037, MT549056, MT536981<br>MT860881<br>MT860882<br>MT860883<br>MT860884<br>MT860885<br>MT860886<br>MT860887<br>MT860888<br>MT860889<br>MT860890<br>MT860891<br>-<br>MT860892<br>MT860893<br>MT860894<br>-<br>-                                                                                |             |
| Agua Blanca,<br>Tabasco, Mexico<br><br><b>AB</b> | <i>P. gymnonotus</i> | M<br>BM<br>BM<br>B<br>BM<br>BM<br>BM<br>BCDFM<br>BCDFM<br>BM<br>BCDF<br>BCDFM<br>M<br>BCDFM        | PgAB02<br>PgAB03<br>PgAB04<br>PgAB05<br>PgAB06<br>PgAB07<br>PgAB08<br>PgAB09<br>PgAB10<br>PgAB11<br>PgAB12<br>PgAB13<br>PgAB14<br>PgAB15                                         | -<br>MT863619<br>MT863620<br>MT863621<br>MT863622<br>MT863623<br>MT863624<br>MT863625, MT559907, MT555009, MT547954<br>MT863626, MT559908, MT555010, MT547955<br>MT863627<br>MT863628, MT559909, MT555011, MT547956<br>MT863629, MT559910, MT555012, MT547957<br>-<br>MT863630, MT559911, MT555013, MT547958 | This studio |

|                                          |                  |                                                                                                 |                                                                                                                                          |                                                                                                                                                                                                                                                                                                                           |             |
|------------------------------------------|------------------|-------------------------------------------------------------------------------------------------|------------------------------------------------------------------------------------------------------------------------------------------|---------------------------------------------------------------------------------------------------------------------------------------------------------------------------------------------------------------------------------------------------------------------------------------------------------------------------|-------------|
|                                          |                  | BCDFM<br>BM<br>BM<br>BCDFM<br>BM<br>BM<br>BM<br>BM<br>BCDFM<br>BM<br>BM<br>BCDFM<br>BCDFM<br>BM | PgAB16<br>PgAB17<br>PgAB18<br>PgAB19<br>PgAB20<br>PgAB21<br>PgAB22<br>PgAB23<br>PgAB24<br>PgAB25<br>PgAB26<br>PgAB27<br>PgAB28<br>PgAB29 | MT863631, MT559912, MT555014, MT547959<br>MT863632<br>MT863633<br>MT863634, MT559913, MT555015, MT547960<br>MT863635<br>MT863636<br>MT863637<br>MT863638<br>MT863639, MT559914, MT555016, MT54761<br>MT863640<br>MT863641<br>MT863642, MT559915, MT555017, MT547962<br>MT863643, MT559916, MT555018, MT547963<br>MT863644 |             |
| Los Ortices, Colima,<br>Mexico<br><br>LO | <i>P. fulvus</i> | B<br>BM<br>BM<br>BM<br>BM<br>BM<br>BM<br>BM<br>BM<br>BM<br>BM<br>BM<br>BM<br>BM                 | PfLO01<br>PfLO02<br>PfLO03<br>PfLO04<br>PfLO05<br>PfLO06<br>PfLO07<br>PfLO08<br>PfLO09<br>PfLO10<br>PfLO11<br>PfLO12<br>PfLO13<br>PfLO14 | MT559944<br>MT559945<br>MT559946<br>MT559947<br>MT559948<br>MT559949<br>MT559950<br>MT559951<br>MT559952<br>MT559953<br>MT559954<br>MT559955<br>MT559956<br>MT559957                                                                                                                                                      | This studio |
| Playa de Oro,<br>Colima,<br>Mexico       | <i>P. fulvus</i> | BM<br>BM<br>BM<br>BM                                                                            | PfPO01<br>PfPO02<br>PfPO03<br>PfPO04                                                                                                     | MT559933<br>MT559934<br>MT559935<br>MT559936                                                                                                                                                                                                                                                                              | This studio |

|                                                                |                      |                                       |                                                                    |                                                                                  |         |
|----------------------------------------------------------------|----------------------|---------------------------------------|--------------------------------------------------------------------|----------------------------------------------------------------------------------|---------|
| <b>PO</b>                                                      |                      | BM<br>BM<br>BM<br>BM<br>BM<br>BM<br>B | PfPO05<br>PfPO06<br>PfPO07<br>PfPO08<br>PfPO09<br>PfPO10<br>PfPO11 | MT559937<br>MT559938<br>MT559939<br>MT559940<br>MT559941<br>MT559942<br>MT559943 |         |
| Jalisco, Mexico<br><b>Ja</b>                                   | <i>P. fulvus</i>     | BCD<br>B                              | PJa01<br>PJa02                                                     | KX590178; KX590469; KX589689<br>KX590180                                         | [31,34] |
| Campeche, Mexico<br><b>Ca</b>                                  | <i>P. fulvus</i>     | BCD                                   | PCa01                                                              | JF447313; KX590455; KX589675                                                     | [31]    |
| Chiapas, Mexico<br><b>Ch</b>                                   | <i>P. fulvus</i>     | BCDF                                  | PCh01                                                              | KX590181; KX590471; KX589691; KX590385                                           | [31]    |
| Tikal, El Petén,<br>Guatemala<br><b>Gu1</b>                    | <i>P. fulvus</i>     | BCD                                   | PGu06                                                              | JF446816; KX590459; KX589679                                                     | [31]    |
| Grutas de Lanquín,<br>Alta Verapaz,<br>Guatemala<br><b>Gu2</b> | <i>P. fulvus</i>     | B<br>B<br>B<br>B<br>B                 | PfGu01<br>PfGu02<br>PfGu03<br>PfGu04<br>PfGu05                     | JF446821<br>JF446820<br>JF446819<br>JF446818<br>JF446817                         | [29]    |
| Grutas de Lanquín,<br>Alta Verapaz,<br>Guatemala<br><b>Gu2</b> | <i>P. gymnonotus</i> | BCDF                                  | PgGu01                                                             | KX590174; KX590457; KX589677; KX590384                                           | [31]    |

|                                                                    |                      |                                      |                                                |                                                                                                                                                                                                                |             |
|--------------------------------------------------------------------|----------------------|--------------------------------------|------------------------------------------------|----------------------------------------------------------------------------------------------------------------------------------------------------------------------------------------------------------------|-------------|
| El Refugio,<br>Ahuachapan, El<br>Salvador<br><br><b>ES</b>         | <i>P. fulvus</i>     | B<br>B<br>B                          | PfES05<br>PfES06<br>PfES07                     | JF446542<br>JF446541<br>JF446540                                                                                                                                                                               | [30]        |
| Colón, Honduras<br><br><b>Ho</b>                                   | <i>P. fulvus</i>     | BCD                                  | PfHo01                                         | KX590179; KX590470; KX589690                                                                                                                                                                                   | [31]        |
| Gallon Jug, Distrito<br>de Orange Walk,<br>Belize<br><br><b>Be</b> | <i>P. fulvus</i>     | B<br>BCD                             | PfBe01<br>PfBe02                               | KX590084<br>KX590085; KX590412; KX589631                                                                                                                                                                       | [31]        |
| Nidiri, Masaya<br>Volcano Park,<br>Nicaragua<br><br><b>Ni</b>      | <i>P. fulvus</i>     | BCDF<br>BCDF<br>BCDF<br>BCDF         | PfNi01<br>PfNi02<br>PfNi03<br>PfNi04           | MT860854, MT559898, MT555000, MT547945<br>MT860855, MT559899, MT555001, MT547946<br>MT860856, MT559900, MT555002, MT547947<br>MT860857, MT559901, MT555003, MT547948                                           | This studio |
| Nidiri, Masaya<br>Volcano Park,<br>Nicaragua<br><br><b>Ni</b>      | <i>P. gymnonotus</i> | BCDF<br>BCDF<br>BCDF<br>BCDF         | PgNi01<br>PgNi02<br>PgNi03<br>PgNi04           | MT871939, MT559924, MT555026, MT547971<br>MT871940, MT559925, MT555027, MT547972<br>MT871941, MT559926, MT555028, MT547973<br>MT871942, MT559927, MT555029, MT547974                                           | This studio |
| Barra Honda National<br>Park, Costa Rica<br><br><b>CR</b>          | <i>P. fulvus</i>     | BCDF<br>BCDF<br>BCDF<br>BCDF<br>BCDF | PfCR01<br>PfCR02<br>PfCR03<br>PfCR04<br>PfCR05 | MT860858, MT559902, MT555004, MT547949<br>MT860859, MT559903, MT555005, MT547950<br>MT860860, MT559904, MT555006, MT547951<br>MT860861, MT559905, MT555007, MT547952<br>MT860862, MT559906, MT555008, MT547953 | This studio |
| Barra Honda National<br>Park, Costa Rica<br><br><b>CR</b>          | <i>P. gymnonotus</i> | BCDF<br>BCDF<br>BCDF<br>BCDF         | PfCR01<br>PfCR02<br>PfCR03<br>PfCR04           | MT862768, MT559928, MT555030, MT547975<br>MT862769, MT559929, MT555031, MT547976<br>MT862770, MT559930, MT555032, MT547977<br>MT862771, MT559931, MT555033, MT547978                                           | This studio |

|                                                             |                      |                    |                                      |                                                                                                        |            |
|-------------------------------------------------------------|----------------------|--------------------|--------------------------------------|--------------------------------------------------------------------------------------------------------|------------|
|                                                             |                      | BCDF               | PfCR05                               | MT862772, MT559932, MT555034, MT547979                                                                 |            |
| Altos de Campana National Park, Panama<br><br><b>Pa</b>     | <i>P. gymnonotus</i> | BCD<br>B<br>B      | PgPa01<br>PgPa02<br>PgPa03           | JF447432; KX590462; KX589682<br>JF447431<br>JF459487                                                   | [30,31,54] |
| Hato la Florida, Bolivar, Venezuela<br><br><b>Ve</b>        | <i>P. gymnonotus</i> | B                  | PgVe01                               | JF447854                                                                                               | [31]       |
| Saint Joseph, Dominica<br><br><b>Do</b>                     | <i>P. davyi</i>      | CD                 | PdDo03                               | KX590467; KX589687                                                                                     | [34]       |
| Arena Reserve, Nariva, Trinidad and Tobago<br><br><b>TT</b> | <i>P. davyi</i>      | BCD                | PdTT01                               | KX590177; KX590468; KX589688                                                                           | [34]       |
| Castries, Santa Lucia<br><br><b>SL</b>                      | <i>P. davyi</i>      | BCD<br>BCDF<br>BCD | PdSL02<br>PdSL06<br>PdSL08           | KX590183; KX590472; KX589692<br>KX590193; KX590473; KX589693; KX590386<br>KX590195; KX590474; KX589694 | [31]       |
| Iwokrama Reserve, Potaro-Siparuni, Guyana<br><br><b>Gy</b>  | <i>P. gymnonotus</i> | B<br>B<br>B<br>B   | PgGy01<br>PgGy02<br>PgGy03<br>PgGy04 | EF080591<br>EF080589<br>EF080590<br>KC011684                                                           | [30,31,53] |

|                                                             |                      |                                     |                                                                    |                                                                                                                          |             |
|-------------------------------------------------------------|----------------------|-------------------------------------|--------------------------------------------------------------------|--------------------------------------------------------------------------------------------------------------------------|-------------|
| Brokopondo,<br>Surinam<br><br><b>Su1</b>                    | <i>P. gymnonotus</i> | BCD<br>B<br>B<br>B<br>B             | PgSu02<br>PgSu03<br>PgSu04<br>PgSu05<br>PgSu06                     | KX590198; KX590477; KX589697<br>EU096898<br>EU096899<br>EU096901<br>JF447711                                             | [ 30,31,52] |
| Bakhluis, Sipaliwini,<br>Surinam<br><br><b>Su2</b>          | <i>P. gymnonotus</i> | B                                   | PgSu01                                                             | EU096900                                                                                                                 | [31]        |
| Huanuco, Peru<br><br><b>Pe</b>                              | <i>P. gymnonotus</i> | BCD<br>BCD                          | PgPe01<br>PgPe02                                                   | KX590196; KX590475; KX589695<br>KX590197; KX590476; KX589696                                                             | [31,34]     |
| Caverna do Bigode,<br>Goiás, Brazil<br><br><b>Go</b>        | <i>P. gymnonotus</i> | B<br>B<br>B<br>B                    | PgGo01<br>PgGo02<br>PgGo03<br>PgGo04                               | MT862764<br>MT862765<br>MT862766<br>MT862767                                                                             | This studio |
| Barro Alto, Goiás,<br>Brazil<br><br><b>Br1</b>              | <i>P. gymnonotus</i> | BCD                                 | PgBr02                                                             | KX590169; KX590453; KX589673                                                                                             | [31]        |
| Tapirapé- Aquiri,<br>Marabá, Pará, Brazil<br><br><b>Br2</b> | <i>P. gymnonotus</i> | BCDF<br>B                           | PgBr32<br>PgBr33                                                   | KX590138; KX590441; KX589658; KX590381<br>KX590140                                                                       | [31]        |
| Carajás, Parauapebas,<br>Pará, Brazil<br><br><b>Br3</b>     | <i>P. gymnonotus</i> | B<br>B<br>B<br>B<br>BCD<br>BCD<br>B | PgBr23<br>PgBr24<br>PgBr25<br>PgBr26<br>PgBr27<br>PgBr28<br>PgBr29 | KX590354<br>KX590357<br>KX590358<br>KX590359<br>KX590360; KX590524; KX589745<br>KX590364; KX590525; KX589746<br>KX590368 | [31]        |

|                                                                        |                      |                                 |                                                          |                                                                                                                       |      |
|------------------------------------------------------------------------|----------------------|---------------------------------|----------------------------------------------------------|-----------------------------------------------------------------------------------------------------------------------|------|
|                                                                        |                      | B<br>B                          | PgBr30<br>PgBr31                                         | KX590370<br>KX590372                                                                                                  |      |
| Canaã dos<br>Carajás,<br>Pará, Brazil<br><br><b>Br4</b>                | <i>P. gymnonotus</i> | BCD<br>B<br>B<br>B<br>B         | PgBr18<br>PgBr19<br>PgBr20<br>PgBr21<br>PgBr22           | KX590312; KX590519; KX589740<br>KX590313<br>KX590329<br>KX590339<br>KX590341                                          | [31] |
| Chapada<br>Diamantina, Bahía,<br>Brazil<br><br><b>Br5</b>              | <i>P. gymnonotus</i> | B<br>BCDF<br>B<br>BCD           | PgBr14<br>PgBr15<br>PgBr16<br>PgBr17                     | KX590307<br>KX590308; KX590517; KX589738; KX590398<br>KX590309<br>KX590310; KX590518; KX589739                        | [31] |
| Usina Serra Grande,<br>Alagoas, Brazil<br><br><b>Br6</b>               | <i>P. gymnonotus</i> | B                               | PgBr13                                                   | KX590306                                                                                                              | [31] |
| Itabaiana, Sergipe,<br>Brazil<br><br><b>Br7</b>                        | <i>P. gymnonotus</i> | B<br>B<br>BCD<br>BCD            | PgBr09<br>PgBr10<br>PgBr11<br>PgBr12                     | KX590294<br>KX590296<br>KX590304; KX590515; KX589736<br>KX590305; KX590516; KX589737                                  | [31] |
| Aiuba Ecological<br>Station, Aiuba,<br>Ceará, Brazil<br><br><b>Br8</b> | <i>P. gymnonotus</i> | B<br>BCDF<br>B<br>B<br>BCD<br>B | PgBr03<br>PgBr04<br>PgBr05<br>PgBr06<br>PgBr07<br>PgBr08 | KX590284<br>KX590285; KX590510; X589731; KX590396<br>KX590286<br>KX590287<br>KX590288; KX590511; KX589732<br>KX590293 | [31] |

|                                              |                      |      |        |                                        |      |
|----------------------------------------------|----------------------|------|--------|----------------------------------------|------|
| Jangada, Mato Grosso, Brazil<br><b>Br9</b>   | <i>P. gymnonotus</i> | BCD  | PgBr01 | KX590156; KX590450; KX589669           | [31] |
| Westmoreland; Revival; Monarva Cave, Jamaica | <i>P. macleayi</i>   | BCDF | Pma    | KX590077, KX590407, KX589626, KX590375 | [31] |
| St. Anns Parish, Jamaica                     | <i>P. quadridens</i> | BCDF | Pqu    | KX590268, KX590502, KX589722, KX590394 | [31] |



Table S2. Primers used for the amplification of fragments of COI, RAG2, and intrones (PRKC1 and STAT5A)

| Locus                              | Primer 5'-3'                                                   | pb  | Cita |
|------------------------------------|----------------------------------------------------------------|-----|------|
| <b>COI</b><br>VF1d<br>VR1d         | F: TTCTCAACCAACCACAARGAYATYGG<br>R: TAGACTTCTGGGTGGCCRAARAAYCA | 607 | [58] |
| <b>RAG2</b><br>RAG2-F1B<br>RAG2-R1 | F: ATCCTGCCCCACTGGAGTTTTTC<br>R: AACYTGYTTATTGTCTCCTGGTATGC    | 717 | [57] |
| <b>Intron</b><br>PRKC1             | F: CTTGTCAATGATGATGAGG<br>R: CCTATTTTAAAATATGAAAGAAATC         | 422 | [59] |
| <b>Intron</b><br>STAT5A            | F: CTGCTCATCAACAAGCCCGA<br>R: GGCTTCAGGTTCCACAGGTTGC           | 475 | [59] |

Table S3. New microsatellite loci

For library construction, genomic DNA was extracted from the muscular tissue of one *P. psilotis* individual (Santiago Ixcuintla, Nayarit, Mexico; voucher UAM-I RLW140304Ppe74) using a salt-extraction protocol [114]. The sample was sent to the Georgia Genomics Facility (University of Georgia, Athens, USA). DNA was sheared using Covaris S2. Fragmented DNA was ligated to Illumina universal TruSeq adapters containing 10 custom nucleotide indexes [115, 116] and were enriched through polymerase chain reaction (PCR), purified and normalized, and sequenced using an Illumina HiSeq 2000 to produce paired-end 100-bp nucleotide reads. The resulting FASTQ files were demultiplexed and the readings were filtered and executed through the PALfinder pipeline to identify adequate microsatellites and for the design of primers [117]. More than 11 million 100-bp readings were obtained, and we registered 8321 loci with primer of which 8 were selected.

PCR amplification was performed using a T100 thermal cycler (Bio-Rad Laboratories, Hercules, USA). The amplification was carried out for each locus separately. The 20- $\mu$ L reaction volume contained 20 ng template DNA, 2  $\mu$ L PCR buffer (20 mM Tris-HCl, pH 8.4, 50 mM KCl), 0.28 mM dNTPs, 0.2 mM of each primer, 3.0 mM magnesium chloride (MgCl<sub>2</sub>) and 0.12 U of *Taq* DNA polymerase (Invitrogen, Carlsbad, USA). Cycling conditions were: 4 min denaturation at 94°C; 26 cycles of denaturation at 94°C for 30 s, annealing for 30 s with temperatures varying by locus and an extension at 72°C for 45 s; others 12 cycles at 94°C for 45 s, 53°C for 45 s, 72°C for 45 s and final extension of 4 min at 72°C, using a MultiGene thermocycler (Labnet International, USA).

| Locus | Primer sequence (5' to 3')                          | Ta (°C) | SSR motif          | Fluorescent | GenBank accession number |
|-------|-----------------------------------------------------|---------|--------------------|-------------|--------------------------|
| Pps10 | F: CCCACAGTCCAAGTTGAATGG<br>R: CATCCAGGCGTTCTACAGGG | 52      | (AC) <sub>24</sub> | 6FAM        | MT505408                 |
| Pps11 | F: GCTCCTCACAATTTGGCAGG<br>R: ACACTTCCAAGTTTGCCCA   | 59.5    | (AG) <sub>6</sub>  | 6FAM        | MT754936                 |
| Pps12 | F: TGTTCTCAGTTTCGTCAGGG<br>R: TCCTGGTTCCTGTCCAGTA   | 59      | (AT) <sub>6</sub>  | PET         | MT754937                 |
| Pps13 | F: CACTCATAACGCCCTCCACA<br>R: TGCAGCTAAACCACAGAGCA  | 59      | (AG) <sub>7</sub>  | VIC         | MT754938                 |
| Pps14 | F: CCCTTAGGCTTGAGCTGCTT<br>R: TGAAGAGGCCTGAATGTGGG  | 60      | (AG) <sub>8</sub>  | 6FAM        | MT754939                 |
| Pps15 | F: AGCCGTGAAATCTCCTTCCC<br>R: GGGAAATGAGGAGGCTGACA  | 59      | (AC) <sub>8</sub>  | VIC         | MT757398                 |

|       |                                                     |    |                   |     |          |
|-------|-----------------------------------------------------|----|-------------------|-----|----------|
| Pps16 | F: GCATGGAGTAGCCTGTTGGA<br>R: TTGTGGCTCTGGGAAATCTGT | 59 | (AC) <sub>6</sub> | NED | MT754940 |
| Pps17 | F: TCTGGATGCTTCGTGCCAAA<br>R: GATGCCGCTGGAAGGGATT   | 60 | (AG) <sub>7</sub> | NED | MT754941 |

Table S4. Haplotypes list from *P. fulvus*, *P. davyi* and *P. gymnonotus* for PRKC1 + STAT5A, RAG2 and COI. The number of haplotypes, the studied site and the number of individuals corresponding to each locality are shown in parenthesis

|            | Intrones (PRKC1 + STAT5A)                                                                                                                                                                                                                                                                                                                                    |
|------------|--------------------------------------------------------------------------------------------------------------------------------------------------------------------------------------------------------------------------------------------------------------------------------------------------------------------------------------------------------------|
| Haplotypes | Species and locality                                                                                                                                                                                                                                                                                                                                         |
| H1         | <i>P. fulvus</i> . Barra Honda National Park, Costa Rica (PfCR01).                                                                                                                                                                                                                                                                                           |
| H2         | <i>P. fulvus</i> . Barra Honda National Park, Costa Rica (PfCRO02).<br><i>P. davyi</i> . Castries, Santa Lucía (PdSL08).                                                                                                                                                                                                                                     |
| H3         | <i>P. fulvus</i> . Barra Honda National Park, Costa Rica (PfCR03 and PfCR04).                                                                                                                                                                                                                                                                                |
| H4         | <i>P. fulvus</i> . Barra Honda National Park, Costa Rica (PfCR05).<br><i>P. fulvus</i> . Jalisco, Mexico (PfJa01).<br><i>P. fulvus</i> . Masaya Volcano Park, Nicaragua (PfNi01 and PfNi03).                                                                                                                                                                 |
| H5         | <i>P. fulvus</i> . Gallon Jug, Distrito de Orange Walk, Belize (PfBe02); Grutas de Lanquin, Alta Verapaz, Guatemala (PfGu06); Agua Blanca, Tabasco, Mexico (PfAB33, PfAB35 and PfAB36); Tapijulapa, Tabasco, Mexico (PfTa13, PfTa32); La Venta, Oaxaca, Mexico (PfLV15, PfLV25, PfLV29, PfLV30, PfLV31); Masaya Volcano Park, Nicaragua (PfNi02 and PfNi04). |
| H6         | <i>P. fulvus</i> . Colón, Honduras (PfHo01).                                                                                                                                                                                                                                                                                                                 |
| H7         | <i>P. fulvus</i> . Chiapas, Mexico (PfCh01).                                                                                                                                                                                                                                                                                                                 |
| H8         | <i>P. fulvus</i> . Campeche, Mexico (PfCa01).                                                                                                                                                                                                                                                                                                                |
| H9         | <i>P. fulvus</i> . La Venta, Oaxaca, Mexico (PfLV35).                                                                                                                                                                                                                                                                                                        |
| H10        | <i>P. davyi</i> . St. Joseph, Dominica (PdDo03); Castries, Santa Lucia (PdSL06).                                                                                                                                                                                                                                                                             |
| H11        | <i>P. davyi</i> . Arena Reserve, Trinidad and Tobago (PdTT01); Castries, Santa Lucía (PdSL02).                                                                                                                                                                                                                                                               |

|            |                                                                                                                                                                                                                                                                                                                                                                                                                                                                                                                                                                                                                                                     |
|------------|-----------------------------------------------------------------------------------------------------------------------------------------------------------------------------------------------------------------------------------------------------------------------------------------------------------------------------------------------------------------------------------------------------------------------------------------------------------------------------------------------------------------------------------------------------------------------------------------------------------------------------------------------------|
| <b>H12</b> | <i>P. gymnonotus</i> . Jangada, Mato Grosso, Brazil (PgBr01); Barro Alto, Goiás, Brazil (PgBr02); Itabaiana, Sergipe, Brazil (PgBr12); Chapada Diamantina, Bahia, Brazil (PgBr15); Carajás, Parauapebas, Pará, Brazil (PgBr27); Tapirapé-Aquiri, Marabá, Pará, Brazil (PgBr32); Huanuco, Perú (PgPe01 and PgPe02); Altos de Campana National Park, Panamá (PgPa01); Barra Honda National Park, Costa Rica (PgCr01, PgCr02, PgCr03 and PgCr05); Grutas de Lanquin, Alta Verapaz, Guatemala (PgGu01); Agua Blanca, Tabasco, Mexico (PgAB10, PgAB13, PgAB15, PgAB16, PgAB24, PgAB27, PgAB28); Tapijulapa, Tabasco, Mexico (PgTa02, PgTa07 and PgTa09). |
| <b>H13</b> | <i>P. gymnonotus</i> . Aiuba, Ceará, Brazil (PgBr04 and PgBr07); Carajás, Parauapebas, Pará, Brazil (PgBr28); Brokopondo, Surinam (PgSu02).                                                                                                                                                                                                                                                                                                                                                                                                                                                                                                         |
| <b>H14</b> | <i>P. gymnonotus</i> . Itabaiana, Sergipe, Brazil (PgBr11); Chapada Diamantina, Bahia, Brazil (PgBr17); Barra Honda National Park, Costa Rica (PgCr04); Agua Blanca, Tabasco, Mexico (PgAB12); Tapijulapa, Tabasco, Mexico (PgTa08); Martínez de la Torre, Oaxaca, Mexico (PgMT01).                                                                                                                                                                                                                                                                                                                                                                 |
| <b>H15</b> | <i>P. gymnonotus</i> . Canaã dos Carajás, Pará, Brazil (PgBr18).                                                                                                                                                                                                                                                                                                                                                                                                                                                                                                                                                                                    |
| <b>H16</b> | <i>P. gymnonotus</i> . Masaya Volcano Park, Nicaragua (PgNi01, PgNi02 and PgNi03).                                                                                                                                                                                                                                                                                                                                                                                                                                                                                                                                                                  |
| <b>H17</b> | <i>P. gymnonotus</i> . Masaya Volcano Park, Nicaragua (PgNi04).                                                                                                                                                                                                                                                                                                                                                                                                                                                                                                                                                                                     |
| <b>H18</b> | <i>P. gymnonotus</i> . Agua Blanca, Tabasco, Mexico (PgAB09 and PgAB19); Tapijulapa, Tabasco, Mexico (PgTa10); Martínez de la Torre, Oaxaca, Mexico (PgMT02).                                                                                                                                                                                                                                                                                                                                                                                                                                                                                       |

|                   |                                                                                                                                                                                                                                                                                                                                                                                                                                                                                                                                                                                                                                                                                                                                                                                                            |
|-------------------|------------------------------------------------------------------------------------------------------------------------------------------------------------------------------------------------------------------------------------------------------------------------------------------------------------------------------------------------------------------------------------------------------------------------------------------------------------------------------------------------------------------------------------------------------------------------------------------------------------------------------------------------------------------------------------------------------------------------------------------------------------------------------------------------------------|
|                   | <b>RAG2</b>                                                                                                                                                                                                                                                                                                                                                                                                                                                                                                                                                                                                                                                                                                                                                                                                |
| <b>Haplotypes</b> | <b>Species and locality</b>                                                                                                                                                                                                                                                                                                                                                                                                                                                                                                                                                                                                                                                                                                                                                                                |
| <b>H1</b>         | <i>P. fulvus</i> . Barra Honda National Park, Costa Rica (PfCr01, PfCr02 and PfCr04); La Venta, Oaxaca, Mexico (PflV35).<br><br><i>P. davyi</i> . Castries, Santa Lucia (PdSL06).                                                                                                                                                                                                                                                                                                                                                                                                                                                                                                                                                                                                                          |
| <b>H2</b>         | <i>P. fulvus</i> . Barra Honda National Park, Costa Rica (PfCr03 and PfCr05); Agua Blanca, Tabasco, Mexico (PfAB35 and PfAB36); Tapijulapa, Tabasco, Mexico (PfTa32). La Venta, Oaxaca, Mexico (PflV15, PflV29 and PflV30).<br><br><i>P. gymnonotus</i> . Aiuba, Ceará, Brazil (PgBr04); Chapada Diamantina, Bahía, Brazil (PgBr15); Tapirapé-Aquiri, Marabá, Pará, Brazil (PgBr32); Barra Honda National Park, Costa Rica (PgCR01, PgCR02, PgCR03, PgCR04 and PgCR05); Masaya Volcano Park, Nicaragua (PgNi01, PgNi02, PgNi03 and PgNi04); Grutas de Lanquin, Alta Verapaz, Guatemala (PgGu01); Agua Blanca, Tabasco, Mexico (PgAB10, PgAB12, PgAB13, PgAB15, PgAB16 and PgAB28); Tapijulapa, Tabasco, Mexico (PgTa02, PgTa07, PgTa08, PgTa09 and PgTa10); Martínez de la Torre, Oaxaca, Mexico (PgMT01). |
| <b>H3</b>         | <i>P. fulvus</i> . Chiapas, Mexico (PfCh01).                                                                                                                                                                                                                                                                                                                                                                                                                                                                                                                                                                                                                                                                                                                                                               |
| <b>H4</b>         | <i>P. fulvus</i> . Agua Blanca, Tabasco, Mexico (PfAB33).                                                                                                                                                                                                                                                                                                                                                                                                                                                                                                                                                                                                                                                                                                                                                  |
| <b>H5</b>         | <i>P. fulvus</i> . Tapijulapa, Tabasco, Mexico (PfTa13).                                                                                                                                                                                                                                                                                                                                                                                                                                                                                                                                                                                                                                                                                                                                                   |
| <b>H6</b>         | <i>P. fulvus</i> . La Venta, Oaxaca, Mexico (PflV25).                                                                                                                                                                                                                                                                                                                                                                                                                                                                                                                                                                                                                                                                                                                                                      |
| <b>H7</b>         | <i>P. fulvus</i> . La Venta, Oaxaca, Mexico (PflV31).                                                                                                                                                                                                                                                                                                                                                                                                                                                                                                                                                                                                                                                                                                                                                      |

|           |                                                                                                                                        |
|-----------|----------------------------------------------------------------------------------------------------------------------------------------|
| <b>H8</b> | <i>P. fulvus</i> . Masaya Volcano Park, Nicaragua (PfNi01, PfNi02, PfNi03 and PfNi04)                                                  |
| <b>H9</b> | <i>P. gymnonotus</i> . Agua Blanca, Tabasco, Mexico (PgAB09, PgAB19, PgAB24 and PgAB27); Martínez de la Torre Oaxaca, Mexico (PgMT02). |

|                   |                                                                                                                                                                                                                                                                  |
|-------------------|------------------------------------------------------------------------------------------------------------------------------------------------------------------------------------------------------------------------------------------------------------------|
|                   | <b>ADNnc (PRKC1 + STAT5A+ RAG2)</b>                                                                                                                                                                                                                              |
| <b>Haplotypes</b> | <b>Species and locality</b>                                                                                                                                                                                                                                      |
| <b>H1</b>         | <i>P. fulvus</i> . Barra Honda National Park, Costa Rica (PfCR01).                                                                                                                                                                                               |
| <b>H2</b>         | <i>P. fulvus</i> . Barra Honda National Park, Costa Rica (PfCR02).<br><i>P. davyi</i> . St. Joseph, Dominica (PdDo03); Castries, Santa Lucia (PdSL06 and PdSL08).                                                                                                |
| <b>H3</b>         | <i>P. fulvus</i> . Barra Honda National Park, Costa Rica (PfCR03).                                                                                                                                                                                               |
| <b>H4</b>         | <i>P. fulvus</i> . Barra Honda National Park, Costa Rica (PfCR04).                                                                                                                                                                                               |
| <b>H5</b>         | <i>P. fulvus</i> . Barra Honda National Park, Costa Rica (PfCR05); Jalisco, Mexico (PfJa01).                                                                                                                                                                     |
| <b>H6</b>         | <i>P. fulvus</i> . Gallon Jug, Distrito de Orange Walk, Belize (PfBe02); Grutas de Lanquin, Alta Verapaz, Guatemala (PfGu06); Agua Blanca, Tabasco, Mexico (PfAB35); Tapijulapa, Tabasco, Mexico (PfTa32); La Venta, Oaxaca, Mexico (PfLV15, PfLV29 and PfLV30). |
| <b>H7</b>         | <i>P. fulvus</i> . Colón, Honduras (PfHo01).                                                                                                                                                                                                                     |
| <b>H8</b>         | <i>P. fulvus</i> . Chiapas, Mexico (PfCh01).                                                                                                                                                                                                                     |
| <b>H9</b>         | <i>P. fulvus</i> . Campeche, Mexico (PfCa01).                                                                                                                                                                                                                    |
| <b>H10</b>        | <i>P. fulvus</i> . Agua Blanca, Tabasco, Mexico (PfAB33 and PfAB36).                                                                                                                                                                                             |

|            |                                                                                                                                                                                                                                                                                                                                                                                                                                                                                                                                                                                                                                     |
|------------|-------------------------------------------------------------------------------------------------------------------------------------------------------------------------------------------------------------------------------------------------------------------------------------------------------------------------------------------------------------------------------------------------------------------------------------------------------------------------------------------------------------------------------------------------------------------------------------------------------------------------------------|
| <b>H11</b> | <i>P. fulvus</i> . Tapijulapa, Tabasco, Mexico (PfTa13).                                                                                                                                                                                                                                                                                                                                                                                                                                                                                                                                                                            |
| <b>H12</b> | <i>P. fulvus</i> . La Venta, Oaxaca, Mexico (PflV25).                                                                                                                                                                                                                                                                                                                                                                                                                                                                                                                                                                               |
| <b>H13</b> | <i>P. fulvus</i> . La Venta, Oaxaca, Mexico (PflV31).                                                                                                                                                                                                                                                                                                                                                                                                                                                                                                                                                                               |
| <b>H14</b> | <i>P. fulvus</i> . La Venta, Oaxaca, Mexico (PflV35).                                                                                                                                                                                                                                                                                                                                                                                                                                                                                                                                                                               |
| <b>H15</b> | <i>P. fulvus</i> . Masaya Volcano Park, Nicaragua (PfNi01, PfNi02, PfNi03 and PfNi04).                                                                                                                                                                                                                                                                                                                                                                                                                                                                                                                                              |
| <b>H16</b> | <i>P. davyi</i> . Arena Reserve, Trinidad and Tobago (PdTT01).                                                                                                                                                                                                                                                                                                                                                                                                                                                                                                                                                                      |
| <b>H17</b> | <i>P. davyi</i> . Castries, Santa Lucía (PdSL02).                                                                                                                                                                                                                                                                                                                                                                                                                                                                                                                                                                                   |
| <b>H18</b> | <i>P. gymnonotus</i> . Jangada, Mato Grosso, Brazil (PgBr01); Barro Alto, Goiás, Brazil (PgBr02); Itabaiana, Sergipe, Brazil (PgBr12); Chapada Diamantina, Bahía, Brazil (PgBr15); Carajás, Parauapebas, Pará, Brazil (PgBr27); Tapirapé-Aquiri, Marabá, Pará, Brazil (PgBr32); Huanuco, Perú (PgPe01 and PgPe02); Altos de Campana National Park, Panamá (PgPa01); Barra Honda National Park, Costa Rica (PgCR01, PgCR02, PgCR03, PgCR05); Grutas de Lanquin, Alta Verapaz, Guatemala (PgGu01); Agua Blanca, Tabasco, Mexico (PgAB10, PgAB13, PgAB15, PgAB16 and PgAB28); Tapijulapa, Tabasco, Mexico (PgTa02, PgTa07 and PgTa09). |
| <b>H19</b> | <i>P. gymnonotus</i> . Aiuba, Ceará, Brazil (PgBr04 and PgBr07); Canaã dos Carajás, Pará, Brazil (PgBr28); Brokopondo, Surinam (PgSu02).                                                                                                                                                                                                                                                                                                                                                                                                                                                                                            |
| <b>H20</b> | <i>P. gymnonotus</i> . Itabaiana, Sergipe, Brazil (PgBr11); Chapada Diamantina, Bahía, Brazil (PgBr17); Barra Honda National Park, Costa Rica (PgCR04); Agua Blanca, Tabasco, Mexico (PgAB12); Tapijulapa, Tabasco, Mexico (PgTa08); Martínez de la Torre Oaxaca, Mexico (PgMT01).                                                                                                                                                                                                                                                                                                                                                  |
| <b>H21</b> | <i>P. gymnonotus</i> . Canaã dos Carajás, Pará, Brazil (PgBr18).                                                                                                                                                                                                                                                                                                                                                                                                                                                                                                                                                                    |
| <b>H22</b> | <i>P. gymnonotus</i> . Masaya Volcano Park, Nicaragua (PgNi01, PgNi02 and PgNi03)                                                                                                                                                                                                                                                                                                                                                                                                                                                                                                                                                   |



|            |                                                                                                                                                                      |
|------------|----------------------------------------------------------------------------------------------------------------------------------------------------------------------|
| <b>H23</b> | <i>P. gymnonotus</i> . Masaya Volcano Park, Nicaragua (PgNi04)                                                                                                       |
| <b>H24</b> | <i>P. gymnonotus</i> . Agua Blanca, Tabasco, Mexico (PgAB09, PgAB19 and PgAB24); Tapijulapa, Tabasco, Mexico (PgTa10); Martínez de la Torre Oaxaca, Mexico (PgMT02). |
| <b>H25</b> | <i>P. gymnonotus</i> . Agua Blanca, Tabasco, Mexico (PgAB27).                                                                                                        |

|                   |                                                                                                                                                                                                                                                                                                                                                                                                                                                           |
|-------------------|-----------------------------------------------------------------------------------------------------------------------------------------------------------------------------------------------------------------------------------------------------------------------------------------------------------------------------------------------------------------------------------------------------------------------------------------------------------|
|                   | <b>COI</b>                                                                                                                                                                                                                                                                                                                                                                                                                                                |
| <b>Haplotypes</b> | <b>Species and locality</b>                                                                                                                                                                                                                                                                                                                                                                                                                               |
| <b>H1</b>         | <i>P. fulvus</i> . Barra Honda National Park, Costa Rica (PfCR01).                                                                                                                                                                                                                                                                                                                                                                                        |
| <b>H2</b>         | <i>P. fulvus</i> . Barra Honda National Park, Costa Rica (PfCR02, PfCR03 and PfCR04); La Venta, Oaxaca, Mexico (PfLV35).<br><i>P. gymnonotus</i> . Agua Blanca, Tabasco, Mexico (PgAB15 and PgAB24).                                                                                                                                                                                                                                                      |
| <b>H3</b>         | <i>P. fulvus</i> . Barra Honda National Park, Costa Rica (PfCR05).                                                                                                                                                                                                                                                                                                                                                                                        |
| <b>H4</b>         | <i>P. fulvus</i> . Gallon Jug, Distrito de Orange Walk, Belize (PfBe02).                                                                                                                                                                                                                                                                                                                                                                                  |
| <b>H5</b>         | <i>P. fulvus</i> . Colón, Honduras (PfHo01).                                                                                                                                                                                                                                                                                                                                                                                                              |
| <b>H6</b>         | <i>P. fulvus</i> . Tikal, El Peten, Guatemala (PfGu06); Chiapas, Mexico (PfCh01); Campeche, Mexico (PfCa01); Tapijulapa, Tabasco, Mexico (PfTa13); Masaya Volcano Park, Nicaragua (PfNi01, PfNi02, PfNi03 and PfNi04).<br><i>P. gymnonotus</i> . Masaya Volcano Park, Nicaragua (PgNi01, PgNi02 and PgNi03); Alta Verapaz, Guatemala (PgGu01); Agua Blanca, Tabasco, Mexico (PgAB19 and PgAB28); Tapijulapa, Tabasco, Mexico (PgTa07, PgTa08 and PgTa10). |
| <b>H7</b>         | <i>P. fulvus</i> . Jalisco, Mexico (PfJa01).                                                                                                                                                                                                                                                                                                                                                                                                              |
| <b>H8</b>         | <i>P. fulvus</i> . Agua Blanca, Tabasco, Mexico (PfAB33, PfAB35 and PfAB36).                                                                                                                                                                                                                                                                                                                                                                              |

|            |                                                                                                                                                                                                                                                                          |
|------------|--------------------------------------------------------------------------------------------------------------------------------------------------------------------------------------------------------------------------------------------------------------------------|
|            | <i>P. gymnonotus</i> . Agua Blanca, Tabasco, Mexico (PgAB12 and PgAB16); Tapijulapa, Tabasco, Mexico (PgTa02).                                                                                                                                                           |
| <b>H9</b>  | <i>P. fulvus</i> . Tapijulapa, Tabasco, Mexico (PfTa32).                                                                                                                                                                                                                 |
| <b>H10</b> | <i>P. fulvus</i> . La Venta, Oaxaca, Mexico (PflV15).                                                                                                                                                                                                                    |
| <b>H11</b> | <i>P. fulvus</i> . La Venta, Oaxaca, Mexico (PflV25, PflV30 and PflV31).                                                                                                                                                                                                 |
| <b>H12</b> | <i>P. fulvus</i> . La Venta, Oaxaca, Mexico (PflV29).                                                                                                                                                                                                                    |
| <b>H13</b> | <i>P. davyi</i> . Arena Reserve, Nariva, Trinidad and Tobago (PdTT01).                                                                                                                                                                                                   |
| <b>H14</b> | <i>P. davyi</i> . Castries, Santa Lucia (PdSL02).                                                                                                                                                                                                                        |
| <b>H15</b> | <i>P. davyi</i> . Castries, Santa Lucia (PdSL06).                                                                                                                                                                                                                        |
| <b>H16</b> | <i>P. davyi</i> . Castries, Santa Lucia (PdSL08).                                                                                                                                                                                                                        |
| <b>H17</b> | <i>P. gymnonotus</i> . Jangada, Mato Grosso, Brazil (PgBr01).                                                                                                                                                                                                            |
| <b>H18</b> | <i>P. gymnonotus</i> . Barro Alto, Goiás, Brazil (PgBr02); Itabaiana, Sergipe, Brazil (PgBr11 and PgBr12); Chapada Diamantina, Bahía, Brazil (PgBr17); Huanuco, Perú (PgPe01 and PgPe02); Brokopondo, Surinam (PgSu02); Altos de Campana National Park, Panamá (PgPa01). |
| <b>H19</b> | <i>P. gymnonotus</i> . Aiuba, Ceará, Brazil (PgBr04).                                                                                                                                                                                                                    |
| <b>H20</b> | <i>P. gymnonotus</i> . Aiuba Ecological Station, Aiuba, Ceará, Brazil (PgBr07).                                                                                                                                                                                          |
| <b>H21</b> | <i>P. gymnonotus</i> . Chapada Diamantina National Park, Bahía, Brazil (PgBr15).                                                                                                                                                                                         |
| <b>H22</b> | <i>P. gymnonotus</i> . Canaã dos Carajás, Pará, Brazil (PgBr18).                                                                                                                                                                                                         |

|            |                                                                                                                                                         |
|------------|---------------------------------------------------------------------------------------------------------------------------------------------------------|
| <b>H23</b> | <i>P. gymnonotus</i> . Carajás, Parauapebas; Pará, Brazil (PgBr27).                                                                                     |
| <b>H24</b> | <i>P. gymnonotus</i> . Carajás, Parauapebas, Pará, Brazil (PgBr28).                                                                                     |
| <b>H25</b> | <i>P. gymnonotus</i> . Tapirapé-Aquiri, Marabá, Pará, Brazil (PgBr32).                                                                                  |
| <b>H26</b> | <i>P. gymnonotus</i> . Barra Honda National Park, Costa Rica (PgCR01).                                                                                  |
| <b>H27</b> | <i>P. gymnonotus</i> . Barra Honda National Park, Costa Rica (PgCR02).                                                                                  |
| <b>H28</b> | <i>P. gymnonotus</i> . Barra Honda National Park, Costa Rica (PgCR03).                                                                                  |
| <b>H29</b> | <i>P. gymnonotus</i> . Barra Honda National Park, Costa Rica (PgCR04 and PgCR05).                                                                       |
| <b>H30</b> | <i>P. gymnonotus</i> . Masaya Volcano Park, Nicaragua (PgNi04); Agua Blanca, Tabasco, Mexico (PgAB09 and PgAB13); Tapijulapa, Tabasco, Mexico (PgTa09). |
| <b>H31</b> | <i>P. gymnonotus</i> . Agua Blanca, Tabasco, Mexico (PgAB10 and PgAB27).                                                                                |
| <b>H32</b> | <i>P. gymnonotus</i> . Martínez de la Torre Oaxaca, Mexico (PgMT01 and PgMT02).                                                                         |

Table S5. Haplotype list for COI marker used for *Pteronotus fulvus* and *P. gymnonotus*. The number of haplotypes, the studied site and the number of individuals corresponding to each locality are

shown in parenthesis.

| Haplotypes | Species and locality                                                                                                                                                                                                                                                                                                                                                                                                                                                                                                                                                                                                                                                                                                                                                                                                                                                                                                                                                                                                                                                                                                                                                                                                                                                                                                                                                                                                                              |
|------------|---------------------------------------------------------------------------------------------------------------------------------------------------------------------------------------------------------------------------------------------------------------------------------------------------------------------------------------------------------------------------------------------------------------------------------------------------------------------------------------------------------------------------------------------------------------------------------------------------------------------------------------------------------------------------------------------------------------------------------------------------------------------------------------------------------------------------------------------------------------------------------------------------------------------------------------------------------------------------------------------------------------------------------------------------------------------------------------------------------------------------------------------------------------------------------------------------------------------------------------------------------------------------------------------------------------------------------------------------------------------------------------------------------------------------------------------------|
| H1         | <p><i>P. fulvus</i>. Laguna Encantada, Veracruz, Mexico (PfLE01, PfLE02, PfLE06, PfLE07, PfLE08, PfLE10, PfLE11, PfLE12, PfLE13, PfLE16, PfLE17); Cerro Huatulco, Oaxaca (PfCH01, PfCH03, PfCH04, PfCH05, PfCH07, PfCH09, PfCH10, PfCH11, PfCH14 and PfCH16); La Venta, Oaxaca, Mexico (PfLV01, PfLV09, PfLV11, PfLV12, PfLV13, PfLV14, PfLV18, PfLV19, PfLV21, PfLV22, PfLV24, PfLV25, PfLV26, PfLV27, PfLV30, PfLV31, PfLV33, PfLV34); Tapijulapa, Tabasco, Mexico (PfTa06); Playa de Oro, Colima, Mexico (PfPO08);</p> <p><i>P. gymnonotus</i>. Tapijulapa, Tabasco, Mexico (PgTa15).</p>                                                                                                                                                                                                                                                                                                                                                                                                                                                                                                                                                                                                                                                                                                                                                                                                                                                      |
| H2         | <p><i>P. fulvus</i>. Laguna Encantada, Veracruz, Mexico (PfLE03, PfLE04 and PfLE05); Cerro Huatulco, Oaxaca (PfCH06 and PfCH08); La Venta, Oaxaca, Mexico (PfLV10 and PfLV16); Tapijulapa, Tabasco, Mexico (PfTa09, PfTa10, PfTa11, PfTa12, PfTa13, PfTa15, PfTa16, PfTa17, PfTa18, PfTa20, PfTa22, PfTa25, PfTa29, PfTa30 and PfTa31); Agua Blanca, Tabasco, Mexico (PfAB01, PfAB02, PfAB03, PfAB04, PfAB05, PfAB08, PfAB09, PfAB10, PfAB11, PfAB12, PfAB14, PfAB15, PfAB16, PfAB17, PfAB19, PfAB21, PfAB22, PfAB24, PfAB25, PfAB26, PfAB27, PfAB28, PfAB29, PfAB32, PfAB37, PfAB39, PfAB40, PfAB41, PfAB42, PfAB43, PfAB44, PfAB45, PfAB46, PfAB47, PfAB49, PfAB50, PfAB51); Campeche, Mexico (PfCa01); Chiapas, Mexico (PfCh01); Grutas de Lanquin, Alta Verapaz, Guatemala (PfGu01, PfGu02, PfGu03 and PfGu05); Tikal, El Peten, Guatemala (PfGu06); El Refugio; Ahuachapan, El Salvador (PfES06 and PfES07); Gallon Jug, Distrito de Orange Walk, Belize (PfBe01); Masaya Volcano Park, Nicaragua (PfNi01, PfNi02, PfNi03 and PfNi04),</p> <p><i>P. gymnonotus</i>. Tapijulapa, Tabasco, Mexico (PgTa04, PgTa05, PgTa07, PgTa08, PgTa10, PgTa11, PgTa12 and PgTa13); Agua Blanca, Tabasco, Mexico (PgAB04, PgAB08, PgAB11, PgAB19, PgAB21, PgAB22, PgAB23 and PgAB28); Grutas de Lanquin, Alta Verapaz, Guatemala (PgGu01); Masaya Volcano Park, Nicaragua (PgNi01, PgNi02 and PgNi03); Altos de Campana National Park, Panamá (PgPa03).</p> |
| H3         | <i>P. fulvus</i> . Laguna Encantada, Veracruz, Mexico (PfLE09); Cerro Huatulco, Oaxaca (PfCH13 and PfCH15).                                                                                                                                                                                                                                                                                                                                                                                                                                                                                                                                                                                                                                                                                                                                                                                                                                                                                                                                                                                                                                                                                                                                                                                                                                                                                                                                       |
| H4         | <i>P. fulvus</i> . Laguna Encantada, Veracruz, Mexico (PfLE14).                                                                                                                                                                                                                                                                                                                                                                                                                                                                                                                                                                                                                                                                                                                                                                                                                                                                                                                                                                                                                                                                                                                                                                                                                                                                                                                                                                                   |
| H5         | <i>P. fulvus</i> . Laguna Encantada, Veracruz, Mexico (PfLE15); La Venta, Oaxaca, Mexico (PfLV17, PfLV28 and PfLV32); Agua Blanca, Tabasco, Mexico (PfAB07); Los Ortices, Colima, Mexico (PfLO07).                                                                                                                                                                                                                                                                                                                                                                                                                                                                                                                                                                                                                                                                                                                                                                                                                                                                                                                                                                                                                                                                                                                                                                                                                                                |

|            |                                                                                                                                                                                                                                                                                                                                                                                                                                                  |
|------------|--------------------------------------------------------------------------------------------------------------------------------------------------------------------------------------------------------------------------------------------------------------------------------------------------------------------------------------------------------------------------------------------------------------------------------------------------|
| <b>H6</b>  | <i>P. fulvus.</i> ); Cerro Huatulco, Oaxaca (PfCH02 and PfCH12); La Venta, Oaxaca, Mexico (PflV23).                                                                                                                                                                                                                                                                                                                                              |
| <b>H7</b>  | <i>P. fulvus.</i> La Venta, Oaxaca, Mexico (PflV02, PflV03, PflV04, PflV06, PflV35); Barra Honda National Park, Costa Rica (PfCR02, PfCR03 and PfCR04).<br><i>P. gymnonotus.</i> Tapijulapa, Tabasco, Mexico (PgTa03); Agua Blanca, Tabasco, Mexico (PgAB07, PgAB15, PgAB17, PgAB18, PgAB20 and PgAB24).                                                                                                                                         |
| <b>H8</b>  | <i>P. fulvus.</i> La Venta, Oaxaca, Mexico (PflV05 and PflV29); Los Ortices, Colima, Mexico (PflO01).                                                                                                                                                                                                                                                                                                                                            |
| <b>H9</b>  | <i>P. fulvus.</i> La Venta, Oaxaca, Mexico (PflV08).                                                                                                                                                                                                                                                                                                                                                                                             |
| <b>H10</b> | <i>P. fulvus.</i> La Venta, Oaxaca, Mexico (PflV15).                                                                                                                                                                                                                                                                                                                                                                                             |
| <b>H11</b> | <i>P. fulvus.</i> La Venta, Oaxaca, Mexico (PflV20); Tapijulapa, Tabasco, Mexico (PfTa04, PfTa05, PfTa08, PfTa21 and PfTa24); Agua Blanca, Tabasco, Mexico (PfAB33, PfAB35 and PfAB36); Los Ortices, Colima, Mexico (PflO06); Playa de Oro, Colima, Mexico (PfPO11).<br><i>P. gymnonotus.</i> Tapijulapa, Tabasco, Mexico (PgTa01, PgTa02, PgTa06 and PgTa17); Agua Blanca, Tabasco, Mexico (PgAB03, PgAB05, PgAB06, PgAB12, PgAB16 and PgAB26). |
| <b>H12</b> | <i>P. fulvus.</i> Tapijulapa, Tabasco, Mexico (PfTa03).                                                                                                                                                                                                                                                                                                                                                                                          |
| <b>H13</b> | <i>P. fulvus.</i> Tapijulapa, Tabasco, Mexico (PfTa27).                                                                                                                                                                                                                                                                                                                                                                                          |
| <b>H14</b> | <i>P. fulvus.</i> Tapijulapa, Tabasco, Mexico (PfTa28); Agua Blanca, Tabasco, Mexico (PfAB31).                                                                                                                                                                                                                                                                                                                                                   |
| <b>H15</b> | <i>P. fulvus.</i> Tapijulapa, Tabasco, Mexico (PfTa32).                                                                                                                                                                                                                                                                                                                                                                                          |
| <b>H16</b> | <i>P. fulvus.</i> Agua Blanca, Tabasco, Mexico (PfAB06).                                                                                                                                                                                                                                                                                                                                                                                         |
| <b>H17</b> | <i>P. fulvus.</i> Agua Blanca, Tabasco, Mexico (PfAB13).                                                                                                                                                                                                                                                                                                                                                                                         |
| <b>H18</b> | <i>P. fulvus.</i> Agua Blanca, Tabasco, Mexico (PfAB18).                                                                                                                                                                                                                                                                                                                                                                                         |
| <b>H19</b> | <i>P. fulvus.</i> Agua Blanca, Tabasco, Mexico (PfAB20).                                                                                                                                                                                                                                                                                                                                                                                         |
| <b>H20</b> | <i>P. fulvus.</i> Agua Blanca, Tabasco, Mexico (PfAB23).                                                                                                                                                                                                                                                                                                                                                                                         |
| <b>H21</b> | <i>P. fulvus.</i> Agua Blanca, Tabasco, Mexico (PfAB30).                                                                                                                                                                                                                                                                                                                                                                                         |
| <b>H22</b> | <i>P. fulvus.</i> Agua Blanca, Tabasco, Mexico (PfAB38).                                                                                                                                                                                                                                                                                                                                                                                         |
| <b>H23</b> | <i>P. fulvus.</i> Los Ortices, Colima, Mexico (PflO02, PflO12); <i>P. fulvus.</i> Jalisco, Mexico (PfJa01).                                                                                                                                                                                                                                                                                                                                      |

|            |                                                                                                                                                                                       |
|------------|---------------------------------------------------------------------------------------------------------------------------------------------------------------------------------------|
| <b>H24</b> | <i>P. fulvus</i> . Los Ortices, Colima, Mexico (PfLO03, PfLO04, PfLO05, PfLO08, PfLO09, PfLO10 and PfLO11); Playa de Oro, Colima, Mexico (PfPO01, PfPO02, PfPO06, PfPO07 and PfPO09). |
| <b>H25</b> | <i>P. fulvus</i> . Los Ortices, Colima, Mexico (PfLO07).                                                                                                                              |
| <b>H26</b> | <i>P. fulvus</i> . Los Ortices, Colima, Mexico (PfLO13).                                                                                                                              |
| <b>H27</b> | <i>P. fulvus</i> . Los Ortices, Colima, Mexico (PfLO14).                                                                                                                              |
| <b>H28</b> | <i>P. fulvus</i> . Playa de Oro, Colima, Mexico (PfPO03).                                                                                                                             |
| <b>H29</b> | <i>P. fulvus</i> . Playa de Oro, Colima, Mexico (PfPO04).                                                                                                                             |
| <b>H30</b> | <i>P. fulvus</i> . Playa de Oro, Colima, Mexico (PfPO05).                                                                                                                             |
| <b>H31</b> | <i>P. fulvus</i> . Playa de Oro, Colima, Mexico (PfPO10).                                                                                                                             |
| <b>H32</b> | <i>P. fulvus</i> . Jalisco, Mexico (PfJa02).                                                                                                                                          |
| <b>H33</b> | <i>P. fulvus</i> . Alta Verapaz, Grutas De Lanquin, Guatemala (PfGu04).                                                                                                               |
| <b>H34</b> | <i>P. fulvus</i> . El Refugio; Ahuachapan, El Salvador (PfES05).                                                                                                                      |
| <b>H35</b> | <i>P. fulvus</i> . Colón, Honduras (PfHo01).                                                                                                                                          |
| <b>H36</b> | <i>P. fulvus</i> . Gallon Jug, Distrito de Orange Walk, Belize (PfBe02).                                                                                                              |
| <b>H37</b> | <i>P. fulvus</i> . Barra Honda National Park, Costa Rica (PfCR01).                                                                                                                    |
| <b>H38</b> | <i>P. fulvus</i> . Barra Honda National Park, Costa Rica (PfCR05).                                                                                                                    |
| <b>H39</b> | <i>P. gymnonotus</i> . Martínez de la Torre, Oaxaca (PfMT01).                                                                                                                         |
| <b>H40</b> | <i>P. gymnonotus</i> . Martínez de la Torre, Oaxaca (PfMT02).                                                                                                                         |
| <b>H41</b> | <i>P. gymnonotus</i> . Tapijulapa, Tabasco, Mexico (PgTa09 and PgTa16); Agua Blanca, Tabasco, Mexico (PgAB09, PgAB13, PgAB25 and PgAB29); Masaya Volcano Park, Nicaragua (PgNi04).    |
| <b>H42</b> | <i>P. gymnonotus</i> . Tapijulapa, Tabasco, Mexico (PgTa14).                                                                                                                          |
| <b>H43</b> | <i>P. gymnonotus</i> . Agua Blanca, Tabasco, Mexico (PgAB10 and PgAB27).                                                                                                              |
| <b>H44</b> | <i>P. gymnonotus</i> . Barra Honda National Park, Costa Rica (PgCR01).                                                                                                                |
| <b>H45</b> | <i>P. gymnonotus</i> . Barra Honda National Park, Costa Rica (PgCR02).                                                                                                                |
| <b>H46</b> | <i>P. gymnonotus</i> . Barra Honda National Park, Costa Rica (PgCR03, PgCR04, and PgCR05).                                                                                            |

|            |                                                                                                                                                                                                                                                                                                                                                                                                                                                                                                                                                                                                                                                                                                                |
|------------|----------------------------------------------------------------------------------------------------------------------------------------------------------------------------------------------------------------------------------------------------------------------------------------------------------------------------------------------------------------------------------------------------------------------------------------------------------------------------------------------------------------------------------------------------------------------------------------------------------------------------------------------------------------------------------------------------------------|
| <b>H47</b> | <i>P. gymnonotus</i> . Altos de Campana National Park, Panamá (PgPa01 and PgPa02); Iwokrama Reserve, Potaro-Siparuni, Guyana (PgGy03); Bakhuis, Sipaliwini, Surinam (PgSu01); Brokopondo, Surinam (PgSu02, PgSu03 and PgSu04); Huánuco, Perú (PgPe01 and PgPe02); Caverna do Bigode, Goiás, Brazil (PgGo03 and PgGo04); Barro Alto, Goiás, Brazil (PgBr02); Aiuba, Ceará, Brazil (PgBr03, PgBr05, PgBr06); Itabaiana, Sergipe, Brazil (PgBr09, PgBr10, PgBr11 and PgBr12); Chapada Diamantina, Bahía, Brazil (PgBr14 and PgBr17); Canaã dos Carajás, Pará, Brazil (PgBr19 and PgBr22); Carajás, Parauapebas, Pará, Brazil (PgBr24, PgBr26, PgBr29 and PgBr31); Tapirapé-Aquiri, Marabá, Pará, Brazil (PgBr33). |
| <b>H48</b> | <i>P. gymnonotus</i> . Hato la Florida, Bolívar, Venezuela (PgVe01).                                                                                                                                                                                                                                                                                                                                                                                                                                                                                                                                                                                                                                           |
| <b>H49</b> | <i>P. gymnonotus</i> . Iwokrama Reserve, Potaro-Siparuni, Guyana (PgGy01, PgGy02 and PgGy04); Brokopondo, Surinam (PgSu06).                                                                                                                                                                                                                                                                                                                                                                                                                                                                                                                                                                                    |
| <b>H50</b> | <i>P. gymnonotus</i> . Brokopondo, Surinam (PgSu05).                                                                                                                                                                                                                                                                                                                                                                                                                                                                                                                                                                                                                                                           |
| <b>H51</b> | <i>P. gymnonotus</i> . Caverna do Bigode, Goiás, Brazil (PgGo01); Aiuba, Ceará, Brazil (PgBr04).                                                                                                                                                                                                                                                                                                                                                                                                                                                                                                                                                                                                               |
| <b>H52</b> | <i>P. gymnonotus</i> . Caverna do Bigode, Goiás, Brazil (PgGo02).                                                                                                                                                                                                                                                                                                                                                                                                                                                                                                                                                                                                                                              |
| <b>H53</b> | <i>P. gymnonotus</i> . Jangada, Mato Grosso, Brazil (PgBr01).                                                                                                                                                                                                                                                                                                                                                                                                                                                                                                                                                                                                                                                  |
| <b>H54</b> | <i>P. gymnonotus</i> . Aiuba, Ceará, Brazil (PgBr07).                                                                                                                                                                                                                                                                                                                                                                                                                                                                                                                                                                                                                                                          |
| <b>H55</b> | <i>P. gymnonotus</i> . Aiuba, Ceará, Brazil (PgBr08);                                                                                                                                                                                                                                                                                                                                                                                                                                                                                                                                                                                                                                                          |
| <b>H56</b> | <i>P. gymnonotus</i> . Usina Serra Grande, Alagoas, Brazil (PgBr13).                                                                                                                                                                                                                                                                                                                                                                                                                                                                                                                                                                                                                                           |
| <b>H57</b> | <i>P. gymnonotus</i> . Chapada Diamantina, Bahía, Brazil (PgBr15).                                                                                                                                                                                                                                                                                                                                                                                                                                                                                                                                                                                                                                             |
| <b>H58</b> | <i>P. gymnonotus</i> . Chapada Diamantina, Bahía, Brazil (PgBr16).                                                                                                                                                                                                                                                                                                                                                                                                                                                                                                                                                                                                                                             |
| <b>H59</b> | <i>P. gymnonotus</i> . Canaã dos Carajás, Pará, Brazil (PgBr18).                                                                                                                                                                                                                                                                                                                                                                                                                                                                                                                                                                                                                                               |
| <b>H60</b> | <i>P. gymnonotus</i> . Canaã dos Carajás, Pará, Brazil (PgBr20); Carajás, Parauapebas, Pará, Brazil (PgBr23, PgBr27 and PgBr30).                                                                                                                                                                                                                                                                                                                                                                                                                                                                                                                                                                               |
| <b>H61</b> | <i>P. gymnonotus</i> . Canaã dos Carajás, Pará, Brazil (PgBr21).                                                                                                                                                                                                                                                                                                                                                                                                                                                                                                                                                                                                                                               |
| <b>H62</b> | <i>P. gymnonotus</i> . Carajás, Parauapebas, Pará, Brazil (PgBr25); Tapirapé-Aquiri, Marabá, Pará, Brazil (PgBr32).                                                                                                                                                                                                                                                                                                                                                                                                                                                                                                                                                                                            |
| <b>H63</b> | <i>P. gymnonotus</i> . Carajás, Parauapebas, Pará, Brazil (PgBr28)                                                                                                                                                                                                                                                                                                                                                                                                                                                                                                                                                                                                                                             |

Table S6. Genetic diversity statistics of microsatellites for each study site of *P. fulvus* and *P. gymnonotus*. Samples number (*N*); summary and mean of the alleles per locus (*Na*); exclusive alleles (*Np*); observed heterozygosity (*HO*), expected heterozygosity (*HE*); summary and mean of allelic



richness (AR). Study localities abbreviations correspond to the locations presented in Table 1.

| Species              | Study site | <i>N</i> | <i>Na</i>                            | <i>Np</i> | <i>Ho</i> | <i>HE</i> | <i>AR</i>                              |
|----------------------|------------|----------|--------------------------------------|-----------|-----------|-----------|----------------------------------------|
| <i>P. fulvus</i>     | PO         | 10       | $\Sigma = 73$<br>$\bar{X} = 5.615$   | 3         | 0.612     | 0.646     | $\Sigma = 54.699$<br>$\bar{X} = 4.208$ |
|                      | LO         | 13       | $\Sigma = 94$<br>$\bar{X} = 7.231$   | 4         | 0.598     | 0.644     | $\Sigma = 55.756$<br>$\bar{X} = 4.289$ |
|                      | AB         | 51       | $\Sigma = 131$<br>$\bar{X} = 10.077$ | 4         | 0.523     | 0.660     | $\Sigma = 55.016$<br>$\bar{X} = 4.232$ |
|                      | Ta         | 31       | $\Sigma = 124$<br>$\bar{X} = 9.538$  | 3         | 0.538     | 0.656     | $\Sigma = 55.977$<br>$\bar{X} = 4.306$ |
|                      | LV         | 34       | $\Sigma = 118$<br>$\bar{X} = 9.077$  | 5         | 0.556     | 0.668     | $\Sigma = 55.27$<br>$\bar{X} = 4.251$  |
|                      | CH         | 16       | $\Sigma = 102$<br>$\bar{X} = 7.846$  | 4         | 0.598     | 0.662     | $\Sigma = 54.334$<br>$\bar{X} = 4.333$ |
| <i>P. gymnonotus</i> | AB         | 27       | $\Sigma = 82$<br>$\bar{X} = 6.308$   | 5         | 0.549     | 0.568     | $\Sigma = 43.303$<br>$\bar{X} = 3.331$ |
|                      | Ta         | 17       | $\Sigma = 86$<br>$\bar{X} = 6.615$   | 8         | 0.574     | 0.622     | $\Sigma = 49.448$<br>$\bar{X} = 3.804$ |

Table S7. Calculation of pairwise  $F_{ST}$  above by with COI and  $R_{ST}$  down by microsatellites. \* $p < 0.05$

| FST<br>RST                 | <i>P. fulvus</i><br>CH | <i>P. fulvus</i><br>LV | <i>P. fulvus</i><br>Ta | <i>P. fulvus</i><br>AB | <i>P. fulvus</i><br>LO | <i>P. fulvus</i><br>PO | <i>P. gymnonotus</i><br>Ta | <i>P. gymnonotus</i><br>AB |
|----------------------------|------------------------|------------------------|------------------------|------------------------|------------------------|------------------------|----------------------------|----------------------------|
| <i>P. fulvus</i><br>CH     | -                      | 0.05518                | 0.47379*               | <b>0.63961*</b>        | 0.26679*               | 0.26252*               | 0.14164*                   | 0.16849*                   |
| <i>P. fulvus</i><br>LV     | 0.13077*               | -                      | 0.23620*               | 0.34647*               | 0.09121*               | 0.08271                | 0.05061                    | 0.05011                    |
| <i>P. fulvus</i><br>Ta     | 0.06633*               | 0.01236                | -                      | 0.06784*               | 0.58659*               | 0.55582*               | 0.07302*                   | 0.16718*                   |
| <i>P. fulvus</i><br>AB     | 0.02808                | 0.02752*               | -0.00508               | -                      | <b>0.72548*</b>        | <b>0.70976*</b>        | 0.17350*                   | 0.25954*                   |
| <i>P. fulvus</i><br>LO     | 0.02488                | 0.08888*               | 0.07581*               | 0.04164*               | -                      | -0.06616               | 0.20040*                   | 0.18635*                   |
| <i>P. fulvus</i><br>PO     | 0.15251*               | 0.21900*               | 0.21090*               | 0.15131*               | -0.00698               | -                      | 0.16031*                   | 0.15681*                   |
| <i>P. gymnonotus</i><br>Ta | 0.07433*               | 0.12288*               | 0.11402*               | 0.07148*               | -0.01649               | 0.03458                | -                          | -0.01675                   |
| <i>P. gymnonotus</i><br>AB | 0.19964*               | <b>0.22451*</b>        | <b>0.22689*</b>        | 0.16416*               | 0.02641*               | 0.05038*               | 0.02114                    | -                          |

Table S8. Number of individuals identified as pure *P. fulvus* puro (Pfu); *P. gymnonotus* (Pgy); unclassified hybrids (SC); and hybrids according to STRUCTURE and NEWHYBRIDS with to criterion 2 of Burgarella et al. [87]. The percentage of the total number of individuals sampled by locality is included in parenthesis.

|  | NEWHYBRIDS | STRUCTURE |
|--|------------|-----------|
|--|------------|-----------|

|              | Pfu        | Pgy        | SC       | Hybrid   | Pfu        | Pgy        | SC    | Hybrid   |
|--------------|------------|------------|----------|----------|------------|------------|-------|----------|
| <b>PO</b>    | 10 (100)   | 0 (0)      | 0 (0)    | 0 (0)    | 9 (90)     | 0 (0)      | 0 (0) | 1 (10)   |
| <b>LO</b>    | 13 (100)   | 0 (0)      | 0 (0)    | 0 (0)    | 13 (100)   | 0 (0)      | 0 (0) | 0 (0)    |
| <b>AB</b>    | 49 (62.82) | 23 (29.48) | 6 (7.69) | 0 (0)    | 49 (62.82) | 27 (34.61) | 0 (0) | 2 (2.56) |
| <b>Ta</b>    | 31 (64.58) | 10 (20.83) | 4 (8.33) | 3 (6.25) | 31 (64.58) | 16 (33.33) | 0 (0) | 1 (2.08) |
| <b>LV</b>    | 34 (100)   | 0 (0)      | 0 (0)    | 0 (0)    | 34 (100)   | 0 (0)      | 0 (0) | 0 (0)    |
| <b>CH</b>    | 15 (93.75) | 0 (0)      | 1 (6.25) | 0 (0)    | 14 (87.5)  | 0 (0)      | 0 (0) | 2 (12.5) |
| <b>Total</b> | 152        | 33         | 11       | 3        | 150        | 43         | 0     | 6        |
